# Supplementary material
Source: PubMed Central journal article supplement (PMC6089805)
Supplement: BCP-84-1989-s001.pdf [file BCP-84-1989-s001.pdf]

Supporting information -

Supplementary Figures - Model validation : goodness-of-fit plots for fluconazole and micafungine

a. Fluconazole

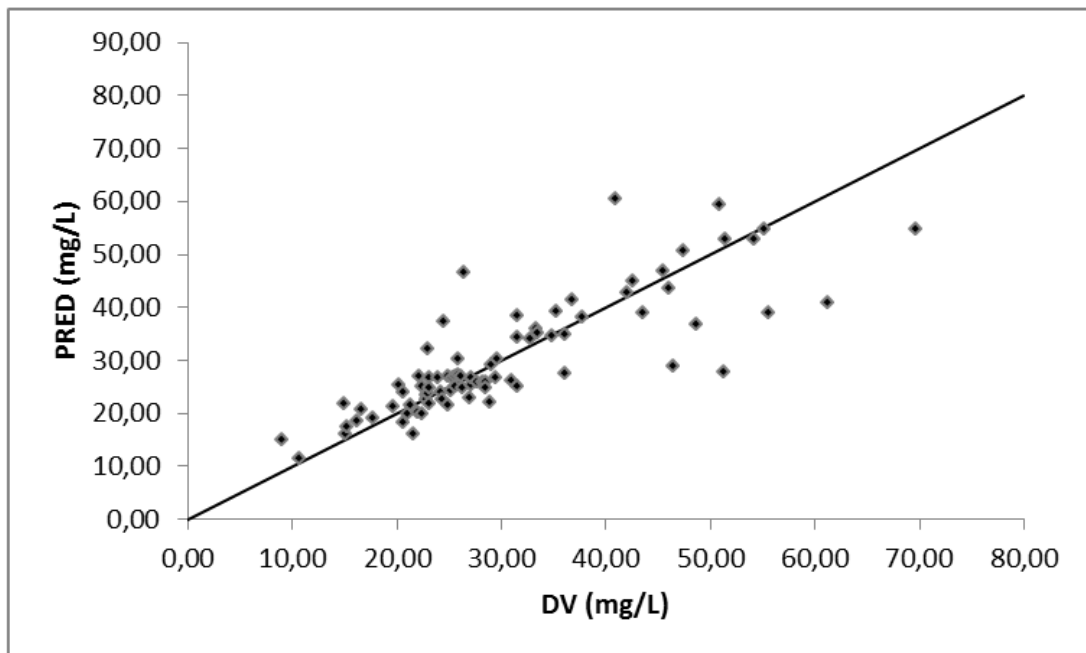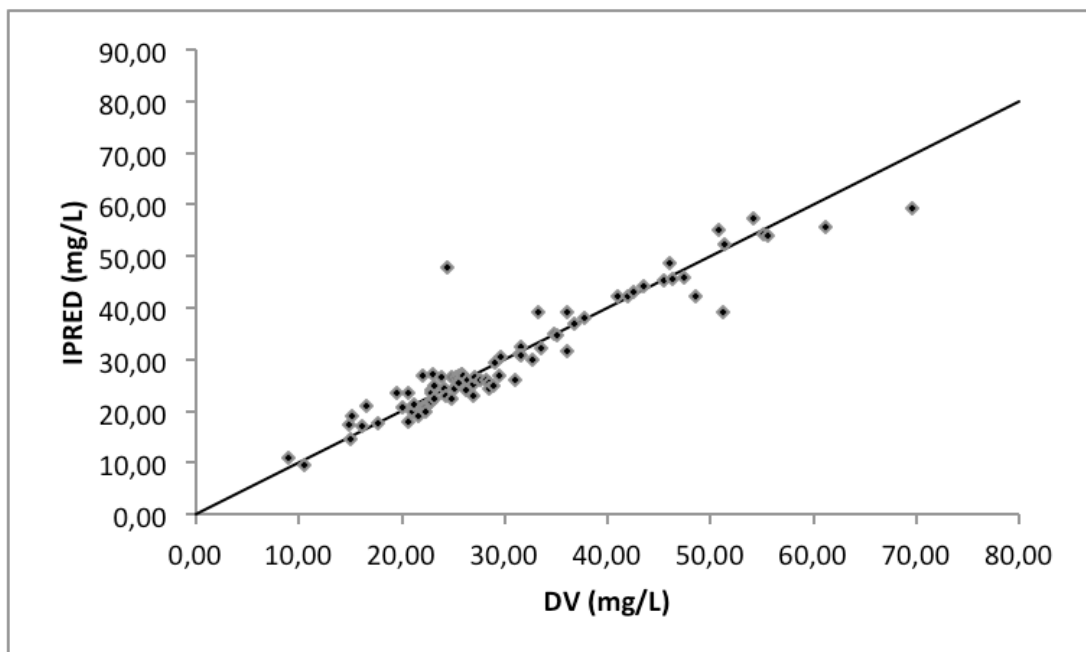

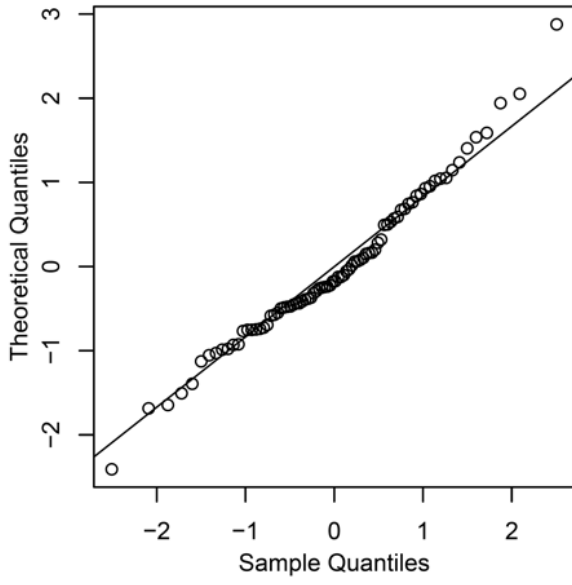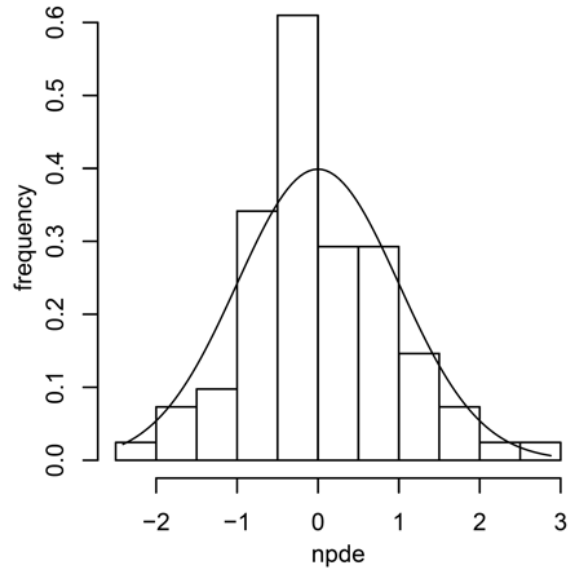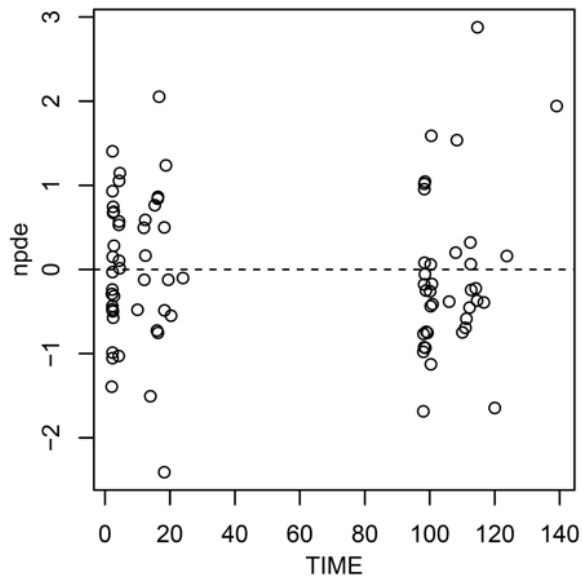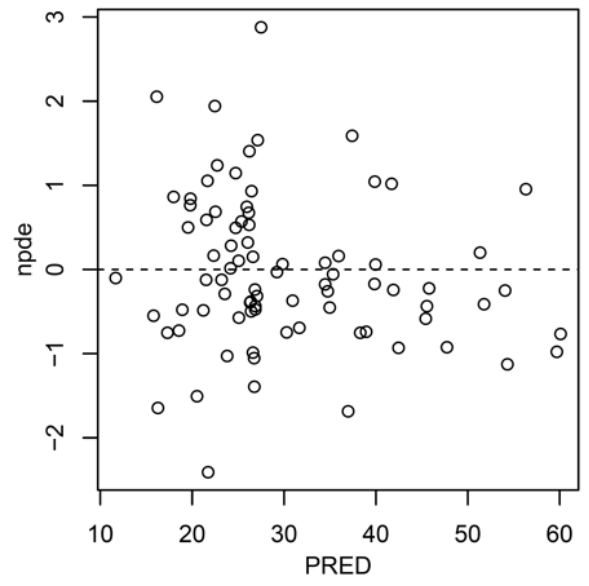

**b. Micafungin**

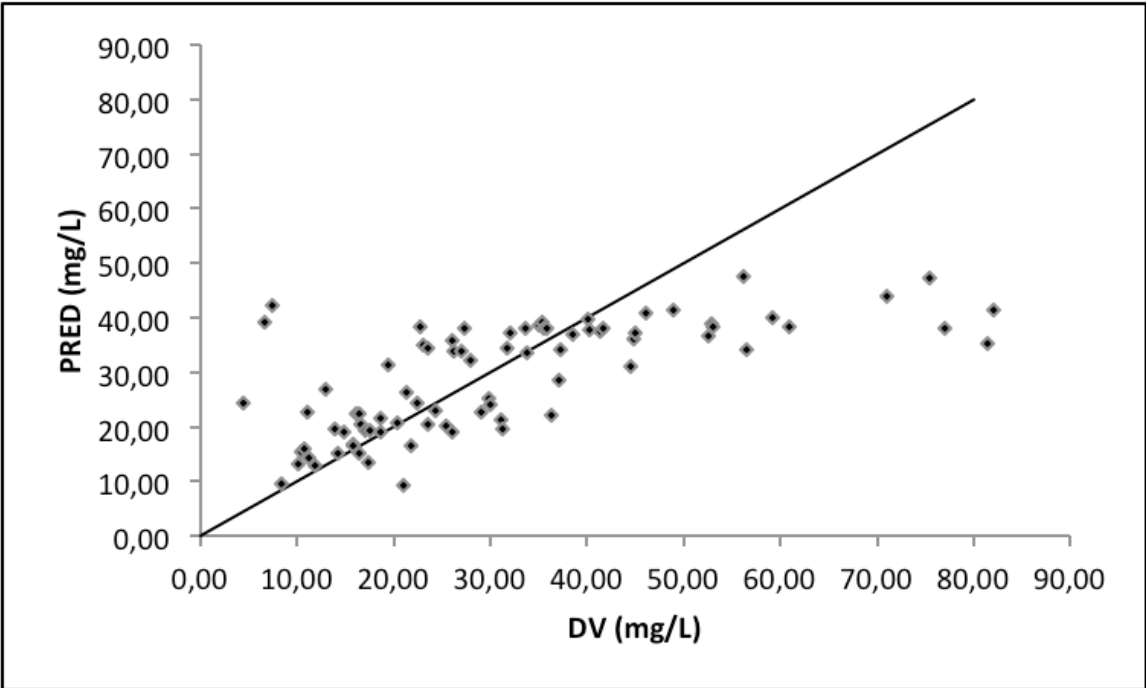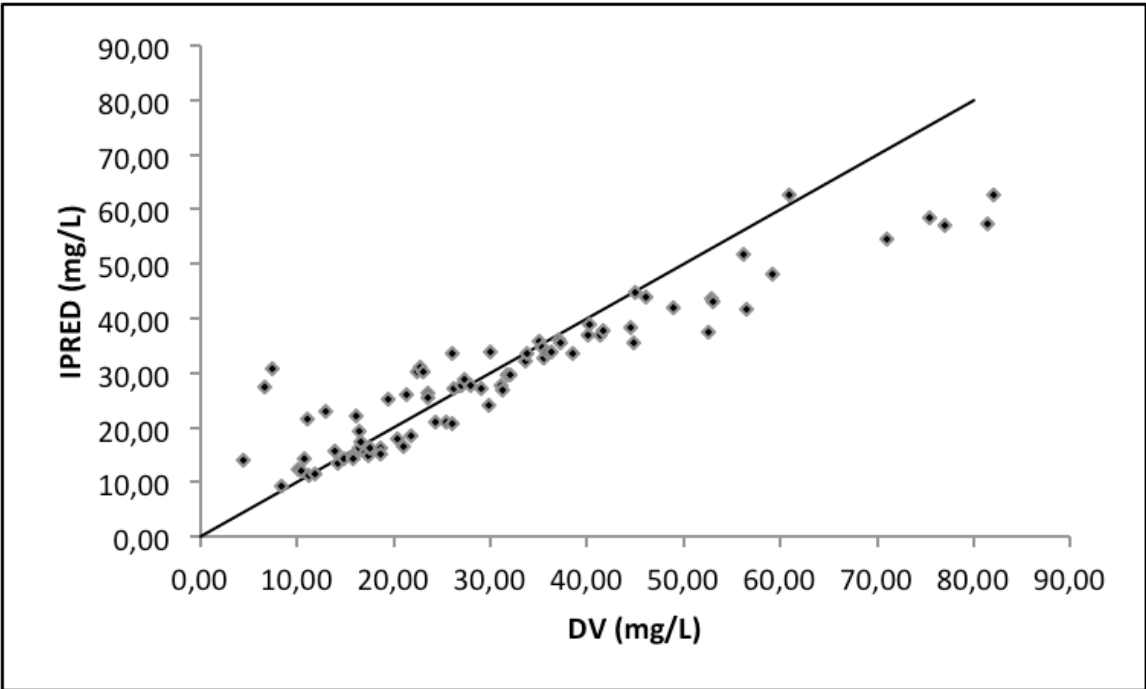

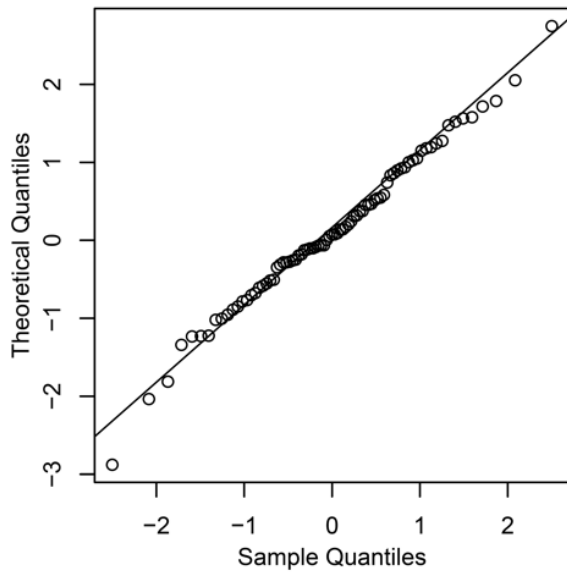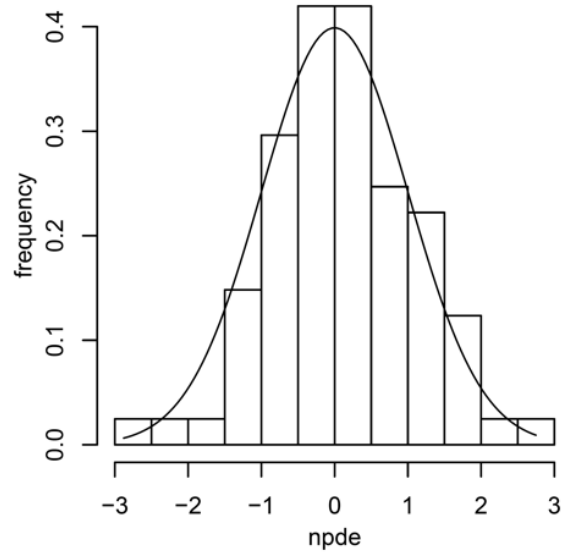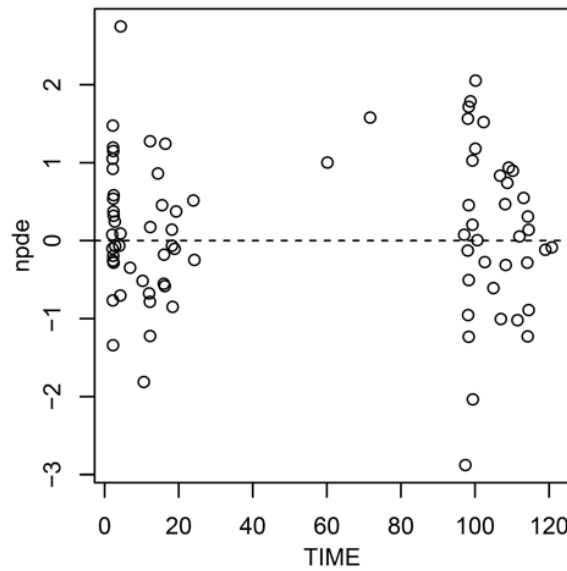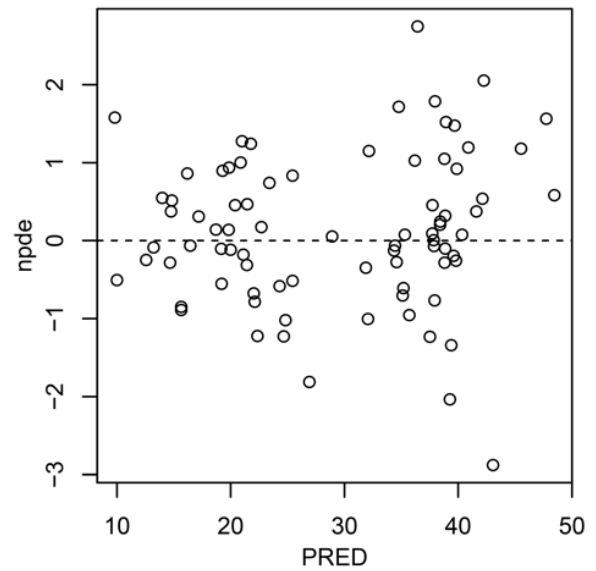

**Goodness-of-fit plots for both fluconazole and micafungin include**

- Observed (DV) versus population prediction (PRED),
- DV versus individual prediction (IPRED),
- Weighted residuals (WRES) versus time
- WRES versus PRED
